# Supplementary material for: Transcriptome Analysis Reveals Multiple Genes and Complex Hormonal-Mediated Interactions with PEG during Adventitious Root Formation in Apple
Source: MDPI journal article supplement (doi:10.3390/ijms23020976), 2022-01-17
Supplement: s1 [file s1]

**Table S1.** Summary of the quality of sequencing data obtained in each sample.

| Sample | Raw read | Raw base | Clean reads | Clean bases | Q20%  | Q30%  | GC content% |
|--------|----------|----------|-------------|-------------|-------|-------|-------------|
| C3_1   | 51693542 | 7.75G    | 46200440    | 6.93G       | 99.98 | 97.67 | 47          |
| C3_2   | 51237050 | 7.69G    | 45618258    | 6.84G       | 99.99 | 97.52 | 47          |
| C3_3   | 53686716 | 8.05G    | 47407606    | 7.11G       | 99.99 | 97.58 | 47          |
| P3_1   | 54661594 | 8.20G    | 47500518    | 7.13G       | 99.99 | 97.59 | 47          |
| P3_2   | 50737654 | 7.61G    | 43019886    | 6.45G       | 99.99 | 97.56 | 47          |
| P3_3   | 52844934 | 7.93G    | 45306530    | 6.80G       | 99.99 | 97.68 | 47          |

**Table S2.** Summary of total, multiple and uniquely mapped reads obtained in each sample.

| Sample | Valid reads | Mapped reads     | Unique Mapped reads | Multi Mapped reads |
|--------|-------------|------------------|---------------------|--------------------|
| C3_1   | 46200440    | 42891815(92.84%) | 32672003(70.72%)    | 10219812(22.12%)   |
| C3_2   | 45618258    | 42423568(93.00%) | 32370404(70.96%)    | 10053164(22.04%)   |
| C3_3   | 47407606    | 44106266(93.04%) | 33840244(71.38%)    | 10266022(21.65%)   |
| P3_1   | 47500518    | 44279275(93.22%) | 33985761(71.55%)    | 10293514(21.67%)   |
| P3_2   | 43019886    | 40101057(93.22%) | 30853917(71.72%)    | 9247140(21.50%)    |
| P3_3   | 45306530    | 42311522(93.39%) | 32437345(71.60%)    | 9874177(21.79%)    |

**Table S3.** Selected differentially expressed genes related to auxin.

| <b>Auxin related</b>     | <b>Annotation</b>                      | <b>Log2FC</b> |
|--------------------------|----------------------------------------|---------------|
| MD04G1149300 (AUX1)      | auxin influx carrier (AUX1 LAX family) | 1.05          |
| MD05G1118600 (AUX1-1)    | auxin influx carrier (AUX1 LAX family) | 1.37          |
| MD10G1121700 (AUX1-2)    | auxin influx carrier (AUX1 LAX family) | 1.58          |
| MD12G1162400 (AUX1-3)    | auxin influx carrier (AUX1 LAX family) | 1.50          |
| MD05G1205800 (AUX/IAA)   | auxin-responsive protein IAA           | 1.14          |
| MD08G1111200 (AUX/IAA-1) | auxin-responsive protein IAA           | -1.21         |
| MD10G1192900 (AUX/IAA-2) | auxin-responsive protein IAA           | 1.72          |
| MD13G1204700 (AUX/IAA-3) | auxin-responsive protein IAA           | -1.73         |
| MD13G1205000 (AUX/IAA-4) | auxin-responsive protein IAA           | 1.60          |
| MD13G1253600 (AUX/IAA-5) | auxin-responsive protein IAA           | -1.28         |
| MD16G1206700 (AUX/IAA-6) | auxin-responsive protein IAA           | 1.75          |
| MD07G1162400 (ARF)       | auxin response factor                  | -1.46         |
| MD08G1015500 (ARF-1)     | auxin response factor                  | -1.09         |
| MD15G1359400 (ARF-2)     | auxin response factor                  | -1.13         |
| MD01G1037100 (GH3)       | Auxin-responsive GH3 family protein,   | 1.75          |
| MD02G1180300 (GH3-1)     | Auxin-responsive GH3 family protein,   | -1.39         |
| MD03G1215800 (GH3-2)     | Auxin-responsive GH3 family protein,   | -2.50         |
| MD03G1284700 (GH3-3)     | Auxin-responsive GH3 family protein,   | 1.76          |
| MD09G1091000 (GH3-4)     | Auxin-responsive GH3 family protein,   | 1.28          |
| MD13G1132300 (GH3-5)     | Auxin-responsive GH3 family protein,   | -2.08         |
| MD16G1142800 (GH3-6)     | Auxin-responsive GH3 family protein,   | -3.25         |
| MD05G1051600 (SAUR)      | SAUR family protein                    | 2.76          |
| MD05G1051700 (SAUR-1)    | SAUR family protein                    | -2.20         |
| MD05G1051800 (SAUR-2)    | SAUR family protein                    | -2.50         |
| MD05G1052000 (SAUR-3)    | SAUR family protein                    | 2.39          |
| MD05G1052100 (SAUR-4)    | SAUR family protein                    | 2.17          |
| MD05G1052200 (SAUR-5)    | SAUR family protein                    | -2.01         |
| MD05G1052500 (SAUR-6)    | SAUR family protein                    | 1.25          |
| MD05G1053200 (SAUR-7)    | SAUR family protein                    | 1.81          |
| MD05G1113600 (SAUR-8)    | SAUR family protein                    | -1.82         |
| MD05G1223400 (SAUR-9)    | SAUR family protein                    | -1.87         |
| MD06G1137300 (SAUR-10)   | SAUR family protein                    | -1.12         |
| MD07G1117400 (SAUR-11)   | SAUR family protein                    | -1.47         |
| MD10G1059200 (SAUR-12)   | SAUR family protein                    | 2.74          |
| MD10G1059500 (SAUR-13)   | SAUR family protein                    | 1.26          |
| MD10G1059600 (SAUR-14)   | SAUR family protein                    | -1.42         |
| MD10G1059700 (SAUR-15)   | SAUR family protein                    | 1.43          |
| MD10G1059800 (SAUR-16)   | SAUR family protein                    | -2.29         |
| MD10G1060100 (SAUR-17)   | SAUR family protein                    | 2.55          |
| MD10G1060200 (SAUR-18)   | SAUR family protein                    | 2.92          |
| MD10G1060300 (SAUR-19)   | SAUR family protein                    | 3.56          |
| MD10G1060500 (SAUR-20)   | SAUR family protein                    | 3.09          |

**Table S4.** Selected differentially expressed genes related to cytokinin.

| <b>Cytokinin related</b> | <b>Annotation</b>                             | <b>Log2FC</b> |
|--------------------------|-----------------------------------------------|---------------|
| MD04G1194300 (CRE1)      | histidine kinase AHK2_3_4                     | 1.39          |
| MD15G1243500 (CRE1-1)    | histidine kinase AHK2_3_4                     | 1.75          |
| MD03G1272900 (APH)       | histidine-containing phosphotransfer peotein  | -1.38         |
| MD04G1212100 (APH-1)     | histidine-containing phosphotransfer peotein  | 3.14          |
| MD12G1226800 (APH-2)     | histidine-containing phosphotransfer peotein  | 2.18          |
| MD00G1165700 (B-ARR)     | two-component response regulator ARR-B family | -2.12         |
| MD03G1086800 (B-ARR-1)   | two-component response regulator ARR-B family | -4.96         |
| MD09G1241800 (B-ARR-2)   | two-component response regulator ARR-B family | -1.01         |
| MD11G1095900 (B-ARR-3)   | two-component response regulator ARR-B family | -4.10         |
| MD13G1108300 (B-ARR-4)   | two-component response regulator ARR-B family | -2.06         |
| MD08G1161200 (A-ARR)     | two-component response regulator ARR-A family | 1.05          |
| MD15G1346400 (A-ARR-1)   | two-component response regulator ARR-A family | 1.55          |

**Table S5.** Selected differentially expressed genes related to abscisic acid.

| <b>Absciscic acid related</b> | <b>Annotation</b>                     | <b>Log2FC</b> |
|-------------------------------|---------------------------------------|---------------|
| MD15G1022500 (ABF)            | ABA responsive element binding factor | -1.15         |
| MD16G1052300 (ABF-1)          | ABA responsive element binding factor | 1.89          |
| MD06G1034000 (PYR/PYL)        | abscisic acid receptor PYR/PYL family | 1.20          |
| MD12G1178800 (PYR/PYL-1)      | abscisic acid receptor PYR/PYL family | 1.22          |
| MD01G1035000 (SnRK2)          | serine/threonine-protein kinase SRK2  | 1.43          |
| MD01G1087300 (SnRK2-1)        | serine/threonine-protein kinase SRK2  | 1.14          |
| MD06G1046300 (SnRK2-2)        | serine/threonine-protein kinase SRK2  | -1.30         |
| MD10G1154200 (SnRK2-3)        | serine/threonine-protein kinase SRK2  | -1.69         |
| MD10G1278400 (SnRK2-4)        | serine/threonine-protein kinase SRK2  | 5.84          |
| MD13G1203400 (SnRK2-5)        | serine/threonine-protein kinase SRK2  | -1.09         |
| MD13G1265500 (SnRK2-6)        | serine/threonine-protein kinase SRK2  | 1.02          |

**Table S6.** Selected differentially expressed genes related to jasmonic acid.

| <b>Jasmonic acid related</b> | <b>Annotation</b> | <b>Log2FC</b> |
|------------------------------|-------------------|---------------|
|------------------------------|-------------------|---------------|

|                       |                                         |       |
|-----------------------|-----------------------------------------|-------|
| MD01G1037100 (MYC2)   | transcription factor MYC2               | 1.06  |
| MD01G1045500 (MYC2-1) | transcription factor MYC2               | -1.44 |
| MD04G1208700 (MYC2-2) | transcription factor MYC2               | -3.13 |
| MD07G1160700 (MYC2-3) | transcription factor MYC2               | 1.15  |
| MD08G1190500 (MYC2-4) | transcription factor MYC2               | -1.36 |
| MD08G1207700 (MYC2-5) | transcription factor MYC2               | -1.09 |
| MD12G1223000 (MYC2-5) | transcription factor MYC2               | -4.57 |
| MD14G1126900 (MYC2-6) | transcription factor MYC2               | 1.67  |
| MD14G1127000 (MYC2-7) | transcription factor MYC2               | 1.33  |
| MD14G1137200 (MYC2-8) | transcription factor MYC2               | -2.57 |
| MD15G1208900 (MYC2-9) | transcription factor MYC2               | 1.10  |
| MD16G1020800 (JAZ)    | jasmonate ZIM domain-containing protein | 1.01  |

**Table S7.** Selected differentially expressed genes related to brassinosteroid.

| <b>Brassinosteroid related</b> | <b>Annotation</b>                                          | <b>Log2FC</b> |
|--------------------------------|------------------------------------------------------------|---------------|
| MD05G1190600 (BRI1)            | protein brassinosteroid insensitive 1                      | -1.20         |
| MD05G1298700 (BRI1-1)          | protein brassinosteroid insensitive 1                      | -1.32         |
| MD06G1100200 (BRI1-2)          | protein brassinosteroid insensitive 1                      | 1.54          |
| MD06G1138800 (BRI1-3)          | protein brassinosteroid insensitive 1                      | 1.19          |
| MD06G1198600 (BRI1-4)          | protein brassinosteroid insensitive 1                      | -1.48         |
| MD11G1273500 (BRI1-5)          | protein brassinosteroid insensitive 1                      | -1.27         |
| MD14G1154900 (BRI1-6)          | protein brassinosteroid insensitive 1                      | 1.27          |
| MD15G1078000 (BRI1-7)          | protein brassinosteroid insensitive 1                      | -1.81         |
| MD15G1278400 (BRI1-8)          | protein brassinosteroid insensitive 1                      | -2.14         |
| MD15G1278600 (BRI1-9)          | protein brassinosteroid insensitive 1                      | -1.82         |
| MD15G1394300 (BRI1-10)         | protein brassinosteroid insensitive 1                      | -1.09         |
| MD15G1404900 (BRI1-11)         | protein brassinosteroid insensitive 1                      | 1.41          |
| MD16G1122000 (BRI1-12)         | protein brassinosteroid insensitive 1                      | 1.10          |
| MD17G1236000 (BRI1-13)         | protein brassinosteroid insensitive 1                      | 1.39          |
| MD17G1262700 (BRI1-14)         | protein brassinosteroid insensitive 1                      | 1.46          |
| MD04G1238900 (BAK1)            | brassinosteroid insensitive 1-associated receptor kinase 1 | -1.09         |
| MD11G1293600 (BAK1-1)          | brassinosteroid insensitive 1-associated receptor kinase 1 | -1.23         |
| MD13G1251500 (BAK1-2)          | brassinosteroid insensitive 1-associated receptor kinase 1 | 1.50          |
| MD16G1126300 (BAK1-3)          | brassinosteroid insensitive 1-associated receptor kinase 1 | 1.59          |
| MD02G1192600 (TCH4)            | xyloglucan:xyloglucosyl transferase TCH4                   | 1.31          |

|                       |                                          |      |
|-----------------------|------------------------------------------|------|
| MD04G1020100 (TCH4-1) | xyloglucan:xyloglucosyl transferase TCH4 | 2.15 |
| MD10G1112700 (TCH4-2) | xyloglucan:xyloglucosyl transferase TCH4 | 1.85 |
| MD10G1315100 (TCH4-3) | xyloglucan:xyloglucosyl transferase TCH4 | 1.56 |
| MD11G1146700 (TCH4-4) | xyloglucan:xyloglucosyl transferase TCH4 | 2.94 |
| MD13G1134600 (TCH4-5) | xyloglucan:xyloglucosyl transferase TCH4 | 1.64 |
| MD15G1303500 (TCH4-6) | xyloglucan:xyloglucosyl transferase TCH4 | 3.93 |
| MD16G1014000 (TCH4-7) | xyloglucan:xyloglucosyl transferase TCH4 | 1.00 |
| MD16G1091200 (TCH4-8) | xyloglucan:xyloglucosyl transferase TCH4 | 1.35 |

**Table S8.** Selected differentially expressed genes related to gibberellin.

| Gibberellin related    | Annotation                | Log2FC |
|------------------------|---------------------------|--------|
| MD02G1276600 (GID1)    | gibberellin receptor GID1 | -1.33  |
| MD07G1043400 (GID1-1)  | gibberellin receptor GID1 | -1.50  |
| MD11G1176900 (GID1-2)  | gibberellin receptor GID1 | 1.23   |
| MD11G1191000 (GID1-3)  | gibberellin receptor GID1 | 1.99   |
| MD12G1227200 (GID1-4)  | gibberellin receptor GID1 | -1.45  |
| MD14G1045500 (GID1-5)  | gibberellin receptor GID1 | -2.59  |
| MD02G1295800 (DELLA)   | DELLA protein             | 1.26   |
| MD03G1088900 (DELLA-1) | DELLA protein             | -3.10  |
| MD04G1181500 (DELLA-2) | DELLA protein             | 1.30   |
| MD07G1030000 (DELLA-3) | DELLA protein             | 1.88   |
| MD09G1264800 (DELLA-4) | DELLA protein             | 1.22   |
| MD11G1097900 (DELLA-5) | DELLA protein             | -1.27  |
| MD11G1196300 (DELLA-6) | DELLA protein             | -1.40  |

**Table S9.** Selected differentially expressed genes related to ethylene.

| Ethylene related      | Annotation                           | Log2FC |
|-----------------------|--------------------------------------|--------|
| MD04G1066000 (CTR1)   | serine/threonine-protein kinase CTR1 | 1.31   |
| MD10G1130000 (CTR1-1) | serine/threonine-protein kinase CTR1 | 1.54   |
| MD10G1130300 (CTR1-2) | serine/threonine-protein kinase CTR1 | 1.34   |
| MD11G1033700 (CTR1-3) | serine/threonine-protein kinase CTR1 | 1.12   |
| MD15G1006000 (CTR1-4) | serine/threonine-protein kinase CTR1 | 1.45   |
| MD15G1146100 (CTR1-5) | serine/threonine-protein kinase CTR1 | 1.08   |
| MD16G1197600 (CTR1-6) | serine/threonine-protein kinase CTR1 | 1.02   |

|                        |                                            |       |
|------------------------|--------------------------------------------|-------|
| MD16G1050800 (EIN3)    | ethylene-insensitive protein 3             | 3.10  |
| MD16G1222100 (EIN3-1)  | ethylene-insensitive protein 3             | -2.43 |
| MD04G1228800 (ERF1)    | ethylene-responsive transcription factor 1 | -1.08 |
| MD05G1198700 (ERF1-1)  | ethylene-responsive transcription factor 1 | -1.03 |
| MD10G1286200 (ERF1-2)  | ethylene-responsive transcription factor 1 | -1.20 |
| MD13G1212900 (ERF1-3)  | ethylene-responsive transcription factor 1 | -3.35 |
| MD13G1213100 (ERF1-4)  | ethylene-responsive transcription factor 1 | -2.73 |
| MD16G1216900 (ERF1-5)  | ethylene-responsive transcription factor 1 | -2.04 |
| MD04G1165400 (ERF2-6)  | ethylene-responsive transcription factor 2 | -1.39 |
| MD05G1030800 (ERF2-7)  | ethylene-responsive transcription factor 2 | -1.16 |
| MD07G1248700 (ERF2-8)  | ethylene-responsive transcription factor 2 | 1.25  |
| MD09G1252000 (ERF2-9)  | ethylene-responsive transcription factor 2 | -1.32 |
| MD15G1334900 (ERF2-10) | ethylene-responsive transcription factor 2 | 1.03  |

**Table S10.** Selected differentially expressed genes related to salicylic acid.

| Salicylic acid related | Annotation                     | Log2FC |
|------------------------|--------------------------------|--------|
| MD05G1109100 (PR-1)    | pathogenesis-related protein 1 | -2.18  |
| MD13G1265800 (PR-1-1)  | pathogenesis-related protein 1 | -2.71  |
| MD13G1053800 (TGA)     | transcription factor TGA       | 1.39   |
| MD17G1133200 (NPR1)    | regulatory protein NPR1        | 1.55   |

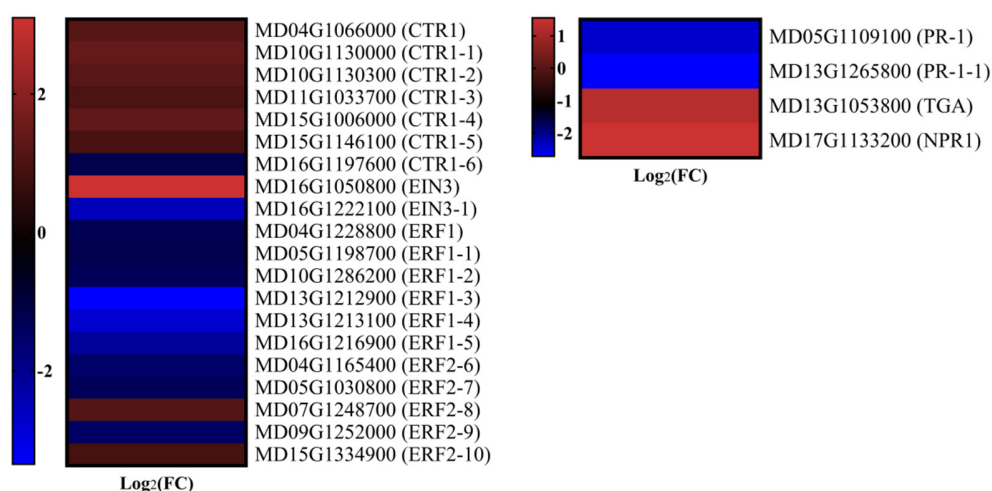

**Figure S1.** Selected DEGs related to ETH and SA from RNA sequencing data (only at S2 of CK and PEG treatment). Heat map diagram of the log2FC, the red and blue colors specify up-and down-regulated expressions.

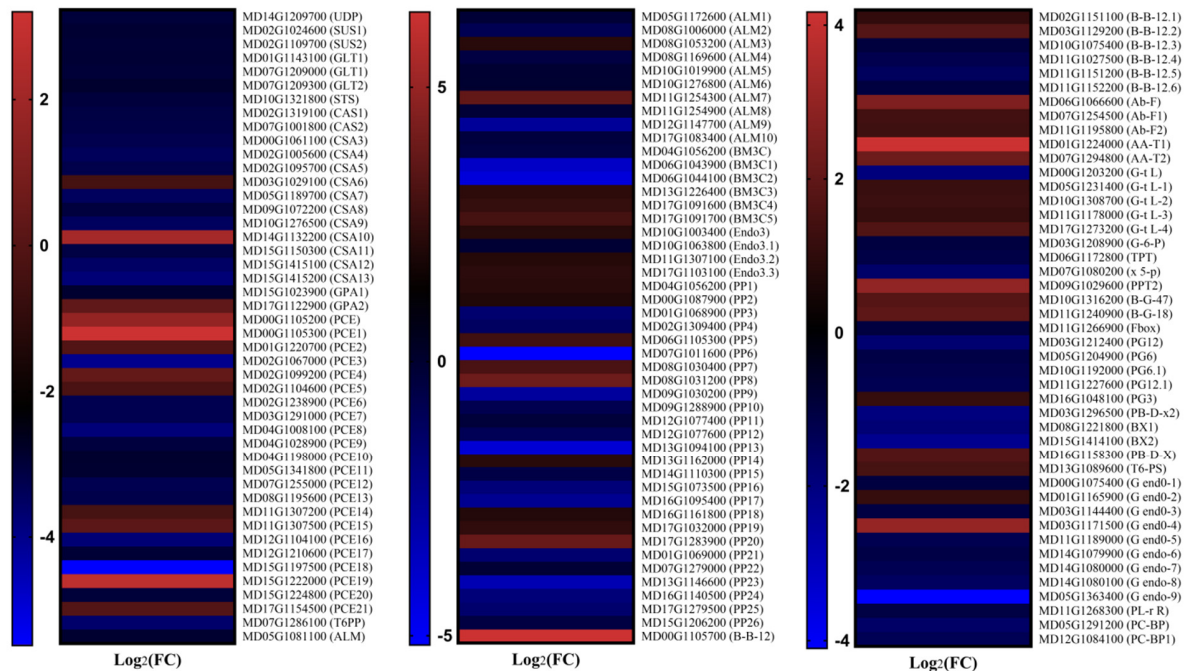

**Figure S2.** Selected DEGs related to starch and sucrose metabolism from RNA sequencing data (only at S2 of CK and PEG treatment). Heat map diagram of the log2FC, the red and blue colors specify up-and down-regulated expressions.

**Table S11.** Selected differentially expressed genes related sugar.

| Sugar related       | Annotation                 | Log2FC |
|---------------------|----------------------------|--------|
| MD14G1209700 (UDP)  | UDPglucose 6-dehydrogenase | -1.27  |
| MD02G1024600 (SUS1) | sucrose synthase           | -1.11  |
| MD02G1109700 (SUS2) | sucrose synthase           | -1.18  |
| MD01G1143100 (GLT1) | glucuronosyltransferase    | -1.16  |
| MD07G1209000 (GLT1) | glucuronosyltransferase    | -1.24  |
| MD07G1209300 (GLT2) | glucuronosyltransferase    | -1.01  |
| MD10G1321800 (STS)  | starch synthase            | -1.30  |
| MD02G1319100 (CAS1) | callose synthase 1-like    | -1.47  |
| MD07G1001800 (CAS2) | callose synthase 1-like    | -1.52  |

|                      |                                          |       |
|----------------------|------------------------------------------|-------|
| MD00G1061100 (CSA3)  | cellulose synthase A catalytic subunit 4 | -1.68 |
| MD02G1005600 (CSA4)  | cellulose synthase A catalytic subunit 4 | -1.94 |
| MD02G1095700 (CSA5)  | cellulose synthase A catalytic subunit 4 | -1.62 |
| MD03G1029100 (CSA6)  | cellulose synthase A catalytic subunit 4 | 1.07  |
| MD05G1189700 (CSA7)  | cellulose synthase A catalytic subunit 4 | -2.02 |
| MD09G1072200 (CSA8)  | cellulose synthase A catalytic subunit 4 | -1.34 |
| MD10G1276500 (CSA9)  | cellulose synthase A catalytic subunit 4 | -2.06 |
| MD14G1132200 (CSA10) | cellulose synthase A catalytic subunit 4 | 2.58  |
| MD15G1150300 (CSA11) | cellulose synthase A catalytic subunit 4 | -1.50 |
| MD15G1415100 (CSA12) | cellulose synthase A catalytic subunit 4 | -2.16 |
| MD15G1415200 (CSA13) | cellulose synthase A catalytic subunit 4 | -2.54 |
| MD15G1023900 (GPA1)  | glucose-1-phosphate adenylyltransferase  | -1.05 |
| MD17G1122900 (GPA2)  | glucose-1-phosphate adenylyltransferase  | 1.49  |
| MD00G1105200 (PCE)   | pectinesterase                           | 2.30  |
| MD00G1105300 (PCE1)  | pectinesterase                           | 3.20  |
| MD01G1220700 (PCE2)  | pectinesterase                           | 1.28  |
| MD02G1067000 (PCE3)  | pectinesterase                           | -3.05 |
| MD02G1099200 (PCE4)  | pectinesterase                           | 1.56  |
| MD02G1104600 (PCE5)  | pectinesterase                           | 1.15  |
| MD02G1238900 (PCE6)  | pectinesterase                           | -1.72 |
| MD03G1291000 (PCE7)  | pectinesterase                           | -1.72 |
| MD04G1008100 (PCE8)  | pectinesterase                           | -2.61 |
| MD04G1028900 (PCE9)  | pectinesterase                           | -1.37 |
| MD04G1198000 (PCE10) | pectinesterase                           | -1.02 |
| MD05G1341800 (PCE11) | pectinesterase                           | -1.05 |
| MD07G1255000 (PCE12) | pectinesterase                           | -1.76 |
| MD08G1195600 (PCE13) | pectinesterase                           | -1.61 |
| MD11G1307200 (PCE14) | pectinesterase                           | 1.09  |
| MD11G1307500 (PCE15) | pectinesterase                           | 1.41  |
| MD12G1104100 (PCE16) | pectinesterase                           | -2.53 |
| MD12G1210600 (PCE17) | pectinesterase                           | -1.20 |
| MD15G1197500 (PCE18) | pectinesterase                           | -5.48 |
| MD15G1222000 (PCE19) | pectinesterase                           | 2.96  |
| MD15G1224800 (PCE20) | pectinesterase                           | -1.28 |
| MD17G1154500 (PCE21) | pectinesterase                           | 1.29  |
| MD07G1286100 (T6PP)  | trehalose 6-phosphate phosphatase        | -2.28 |
| MD05G1081100 (ALM)   | alpha-amylase                            | -1.04 |



|                        |                                |       |
|------------------------|--------------------------------|-------|
| MD05G1172600 (ALM1)    | alpha-amylase                  | -1.12 |
| MD08G1006000 (ALM2)    | alpha-amylase                  | -1.68 |
| MD08G1053200 (ALM3)    | alpha-amylase                  | 1.25  |
| MD08G1169600 (ALM4)    | alpha-amylase                  | -1.37 |
| MD10G1019900 (ALM5)    | alpha-amylase                  | -1.04 |
| MD10G1276800 (ALM6)    | alpha-amylase                  | -1.00 |
| MD11G1254300 (ALM7)    | alpha-amylase                  | 3.05  |
| MD11G1254900 (ALM8)    | alpha-amylase                  | -1.10 |
| MD12G1147700 (ALM9)    | alpha-amylase                  | -3.12 |
| MD17G1083400 (ALM10)   | alpha-amylase                  | -1.28 |
| MD04G1056200 (BM3C)    | beta-amylase 3, chloroplastic  | -1.40 |
| MD06G1043900 (BM3C1)   | beta-amylase 3, chloroplastic  | -4.05 |
| MD06G1044100 (BM3C2)   | beta-amylase 3, chloroplastic  | -4.45 |
| MD13G1226400 (BM3C3)   | beta-amylase 3, chloroplastic  | 1.38  |
| MD17G1091600 (BM3C4)   | beta-amylase 3, chloroplastic  | 1.60  |
| MD17G1091700 (BM3C5)   | beta-amylase 3, chloroplastic  | 2.16  |
| MD10G1003400 (Endo3)   | endoglucanase 3-like precursor | 1.21  |
| MD10G1063800 (Endo3.1) | endoglucanase 3-like precursor | -1.07 |
| MD11G1307100 (Endo3.2) | endoglucanase 3-like precursor | 1.13  |
| MD17G1103100 (Endo3.3) | endoglucanase 3-like precursor | 1.31  |
| MD04G1056200 (PP1)     | probable polygalacturonase     | 1.22  |
| MD00G1087900 (PP2)     | probable polygalacturonase     | 1.01  |
| MD01G1068900 (PP3)     | probable polygalacturonase     | -2.25 |
| MD02G1309400 (PP4)     | probable polygalacturonase     | -1.95 |
| MD06G1105300 (PP5)     | probable polygalacturonase     | 1.98  |
| MD07G1011600 (PP6)     | probable polygalacturonase     | -5.17 |
| MD08G1030400 (PP7)     | probable polygalacturonase     | 2.29  |
| MD08G1031200 (PP8)     | probable polygalacturonase     | 3.40  |
| MD09G1030200 (PP9)     | probable polygalacturonase     | -3.18 |
| MD09G1288900 (PP10)    | probable polygalacturonase     | -1.63 |
| MD12G1077400 (PP11)    | probable polygalacturonase     | -1.20 |
| MD12G1077600 (PP12)    | probable polygalacturonase     | -1.78 |
| MD13G1094100 (PP13)    | probable polygalacturonase     | -4.32 |
| MD13G1162000 (PP14)    | probable polygalacturonase     | 1.22  |
| MD14G1110300 (PP15)    | probable polygalacturonase     | -1.43 |
| MD15G1073500 (PP16)    | probable polygalacturonase     | -2.45 |
| MD16G1095400 (PP17)    | probable polygalacturonase     | -2.93 |

|                         |                                                                  |       |
|-------------------------|------------------------------------------------------------------|-------|
| MD16G1161800 (PP18)     | probable polygalacturonase                                       | 1.06  |
| MD17G1032000 (PP19)     | probable polygalacturonase                                       | 1.52  |
| MD17G1283900 (PP20)     | probable polygalacturonase                                       | 3.17  |
| MD01G1069000 (PP21)     | probable polygalacturonase                                       | -2.24 |
| MD07G1279000 (PP22)     | probable polygalacturonase                                       | -1.12 |
| MD13G1146600 (PP23)     | probable polygalacturonase                                       | -3.62 |
| MD16G1140500 (PP24)     | probable polygalacturonase                                       | -2.46 |
| MD17G1279500 (PP25)     | probable polygalacturonase                                       | -2.20 |
| MD15G1206200 (PP26)     | probable polygalacturonase                                       | -1.35 |
| MD00G1105700 (B-B-12)   | beta-glucosidase 12-like precursor                               | 6.37  |
| MD02G1151100 (B-B-12.1) | beta-glucosidase 12-like precursor                               | 1.00  |
| MD03G1129200 (B-B-12.2) | beta-glucosidase 12-like precursor                               | 1.68  |
| MD10G1075400 (B-B-12.3) | beta-glucosidase 12-like precursor                               | -1.01 |
| MD11G1027500 (B-B-12.4) | beta-glucosidase 12-like precursor                               | -1.28 |
| MD11G1151200 (B-B-12.5) | beta-glucosidase 12-like precursor                               | -1.50 |
| MD11G1152200 (B-B-12.6) | beta-glucosidase 12-like precursor                               | -1.03 |
| MD06G1066600 (Ab-F)     | acid beta-fructofuranosidase                                     | 2.57  |
| MD07G1254500 (Ab-F1)    | acid beta-fructofuranosidase                                     | 1.33  |
| MD11G1195800 (Ab-F2)    | acid beta-fructofuranosidase                                     | 1.27  |
| MD01G1224000 (AA-T1)    | alpha,alpha-trehalase                                            | 4.17  |
| MD07G1294800 (AA-T2)    | alpha,alpha-trehalase                                            | 2.21  |
| MD00G1203200 (G-t L)    | G-type lectin S-receptor-like serine/threonine-protein kinase    | -2.00 |
| MD05G1231400 (G-t L-1)  | G-type lectin S-receptor-like serine/threonine-protein kinase    | 1.12  |
| MD10G1308700 (G-t L-2)  | G-type lectin S-receptor-like serine/threonine-protein kinase    | 1.20  |
| MD11G1178000 (G-t L-3)  | G-type lectin S-receptor-like serine/threonine-protein kinase    | 1.06  |
| MD17G1273200 (G-t L-4)  | G-type lectin S-receptor-like serine/threonine-protein kinase    | 1.64  |
| MD03G1208900 (G-6-P)    | glucose-6-phosphate/phosphate translocator 1, chloroplastic-like | -1.03 |
| MD06G1172800 (TPT)      | triose phosphate/phosphate translocator                          | -1.15 |
| MD07G1080200 (x 5-p)    | xylulose 5-phosphate/phosphate translocator                      | -1.70 |
| MD09G1029600 (PPT2)     | phosphoenolpyruvate/phosphate translocator 2                     | 2.93  |
| MD10G1316200 (B-G-47)   | beta-glucosidase 47-like isoform X1                              | 1.71  |
| MD11G1240900 (B-G-18)   | beta-glucosidase 18-like isoform X1                              | 1.88  |
| MD11G1266900 (Fbox)     | F-box/LRR-repeat protein At3g58900-like isoform X1               | -1.03 |
| MD03G1212400 (PG12)     | probable galacturonosyltransferase 12                            | -1.82 |
| MD05G1204900 (PG6)      | probable galacturonosyltransferase 6 isoform X1                  | -1.15 |
| MD10G1192000 (PG6.1)    | probable galacturonosyltransferase 6 isoform X1                  | -1.24 |
| MD11G1227600 (PG12.1)   | probable galacturonosyltransferase 12                            | -1.35 |

|                         |                                                      |       |
|-------------------------|------------------------------------------------------|-------|
| MD16G1048100 (PG3)      | probable galacturonosyltransferase 3                 | 1.06  |
| MD03G1296500 (PB-D-x2)  | probable beta-D-xylosidase 2                         | -2.03 |
| MD08G1221800 (BX1)      | beta-xylosidase/alpha-L-arabinofuranosidase          | -1.88 |
| MD15G1414100 (BX2)      | beta-xylosidase/alpha-L-arabinofuranosidase          | -2.30 |
| MD16G1158300 (PB-D-X)   | putative beta-D-xylosidase precursor                 | 1.65  |
| MD13G1089600 (T6-PS)    | trehalose 6-phosphate synthase/phosphatase           | 1.44  |
| MD00G1075400 (G end0-1) | glucan endo-1,3-beta-glucosidase 14                  | -1.04 |
| MD01G1165900 (G end0-2) | glucan endo-1,3-beta-glucosidase 14                  | 1.08  |
| MD03G1144400 (G end0-3) | glucan endo-1,3-beta-glucosidase 14-like isoform X1  | -1.07 |
| MD03G1171500 (G end0-4) | glucan endo-1,3-beta-glucosidase-like                | 3.03  |
| MD11G1189000 (G end0-5) | glucan endo-1,3-beta-glucosidase-like                | -1.29 |
| MD14G1079900 (G end0-6) | glucan endo-1,3-beta-glucosidase, basic isoform-like | -1.14 |
| MD14G1080000 (G end0-7) | glucan endo-1,3-beta-glucosidase, basic isoform-like | -1.35 |
| MD14G1080100 (G end0-8) | glucan endo-1,3-beta-glucosidase, basic isoform-like | -1.55 |
| MD05G1363400 (G end0-9) | glucan endo-1,3-beta-glucosidase 5-like              | -4.10 |
| MD11G1268300 (PL-r R)   | probable leucine-rich repeat receptor-like           | -1.10 |
| MD05G1291200 (PC-BP)    | PLASMODESMATA CALLOSE-BINDING PROTEIN 1-like         | -1.67 |
| MD12G1084100 (PC-BP1)   | PLASMODESMATA CALLOSE-BINDING PROTEIN 1-like         | -1.36 |

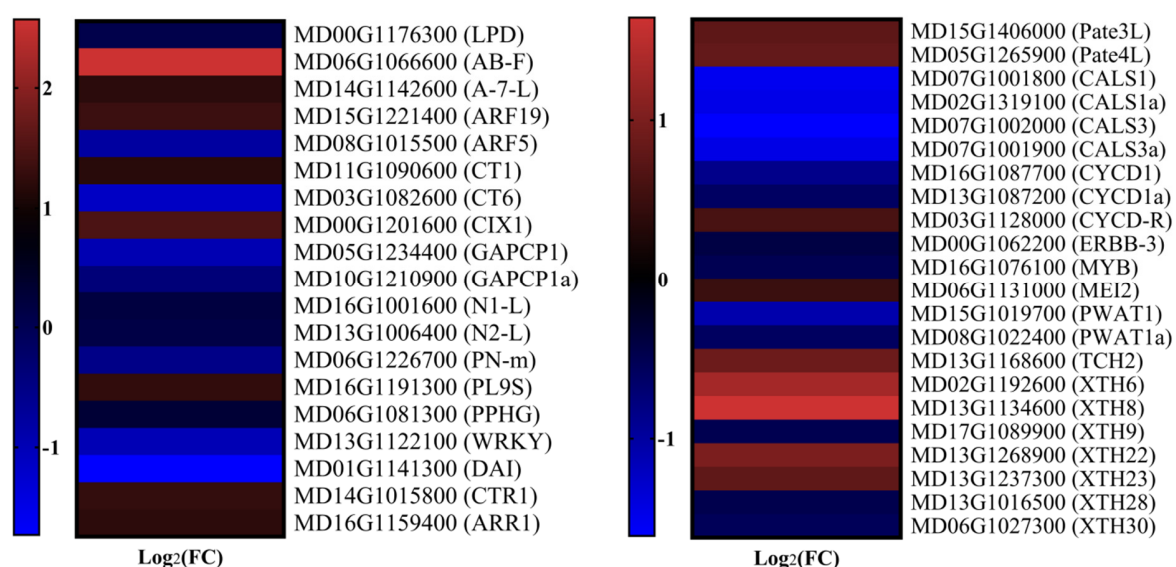

**Figure S3.** Selected genes related to root development and cell cycle from RNA sequencing data (only at S2 of CK and PEG treatment). Heat map diagram of the log2FC, the red and blue colors specify up-and down-regulated expressions.

**Table S12.** Selected differentially expressed genes related to root development.

| Root development       | Annotation                                                 | log2(fc) |
|------------------------|------------------------------------------------------------|----------|
| MD00G1176300 (LPD)     | 14-3-3-like protein D                                      | -0.51    |
| MD06G1066600 (AB-F)    | acid beta-fructofuranosidase                               | 2.57     |
| MD14G1142600 (A-7-L)   | actin-7-like                                               | 0.53     |
| MD15G1221400 (ARF19)   | auxin response factor 19-like isoform X2                   | 0.73     |
| MD08G1015500 (ARF5)    | auxin response factor 5-like                               | -1.09    |
| MD11G1090600 (CT1)     | copper transporter 1-like                                  | 0.51     |
| MD03G1082600 (CT6)     | copper transporter 6-like                                  | -1.33    |
| MD00G1201600 (CIX1)    | cryptochrome-1 isoform X1                                  | 0.94     |
| MD05G1234400 (GAPCP1)  | glyceraldehyde-3-phosphate dehydrogenase GAPCP1            | -1.21    |
| MD10G1210900 (GAPCP1a) | glyceraldehyde-3-phosphate dehydrogenase GAPCP1            | -0.82    |
| MD16G1001600 (N1-L)    | nucleolin 1-like                                           | -0.44    |
| MD13G1006400 (N2-L)    | nucleolin 2-like                                           | -0.48    |
| MD06G1226700 (PN-m)    | phosphoethanolamine N-methyltransferase 1-like             | -0.92    |
| MD16G1191300 (PL9S)    | probable linoleate 9S-lipoxygenase 5                       | 0.61     |
| MD06G1081300 (PPHG)    | probable phospholipid hydroperoxide glutathione peroxidase | -0.37    |
| MD13G1122100 (WRKY)    | probable WRKY transcription factor 75                      | -1.23    |
| MD01G1141300 (DAI)     | protein DAI-related 2 isoform X1                           | -1.73    |
| MD14G1015800 (CTR1)    | serine/threonine-protein kinase CTR1-like isoform X2       | 0.63     |
| MD16G1159400 (ARR1)    | two-component response regulator ARR1-like isoform X2      | 0.55     |

**Table S13.** Selected differentially expressed genes related to cell cycle.

| Cell cycle            | Annotation                                    | log2(fc) |
|-----------------------|-----------------------------------------------|----------|
| MD15G1406000 (Pate3L) | patellin-3-like                               | 0.74     |
| MD05G1265900 (Pate4L) | patellin-4-like isoform X2                    | 0.79     |
| MD07G1001800 (CALS1)  | callose synthase 1                            | -1.52    |
| MD02G1319100 (CALS1a) | callose synthase 1-like                       | -1.47    |
| MD07G1002000 (CALS3)  | callose synthase 3-like                       | -1.61    |
| MD07G1001900 (CALS3a) | callose synthase 3-like                       | -1.46    |
| MD16G1087700 (CYCD1)  | cyclin-D1-1                                   | -0.88    |
| MD13G1087200 (CYCD1a) | cyclin-D1-1-like                              | -0.63    |
| MD03G1128000 (CYCD-R) | cyclin-dependent kinases regulatory subunit 1 | 0.57     |
| MD00G1062200 (ERBB-3) | ERBB-3 BINDING PROTEIN 1 isoform X1           | -0.43    |

|                       |                                                           |       |
|-----------------------|-----------------------------------------------------------|-------|
| MD16G1076100 (MYB)    | myb-like protein Q isoform X2                             | -0.52 |
| MD06G1131000 (MEI2)   | protein MEI2-like 1 isoform X1                            | 0.46  |
| MD15G1019700 (PWAT1)  | protein WALLS ARE THIN 1                                  | -1.09 |
| MD08G1022400 (PWAT1a) | protein WALLS ARE THIN 1-like                             | -0.61 |
| MD13G1168600 (TCH2)   | xyloglucan 6-xylosyltransferase 2-like                    | 0.86  |
| MD02G1192600 (XTH6)   | xyloglucan endotransglucosylase/hydrolase protein 6       | 1.31  |
| MD13G1134600 (XTH8)   | xyloglucan endotransglucosylase/hydrolase protein 8       | 1.64  |
| MD17G1089900 (XTH9)   | xyloglucan endotransglucosylase/hydrolase protein 9-like  | -0.51 |
| MD13G1268900 (XTH22)  | xyloglucan endotransglucosylase/hydrolase protein 22-like | 0.98  |
| MD13G1237300 (XTH23)  | xyloglucan endotransglucosylase/hydrolase protein 23      | 0.76  |
| MD13G1016500 (XTH28)  | xyloglucan endotransglucosylase/hydrolase protein 28      | -0.49 |
| MD06G1027300 (XTH30)  | xyloglucan endotransglucosylase/hydrolase protein 30      | -0.56 |

**Table S14.** Pair of primers used in this study

| Gene name | Gene ID      | Primer                  |
|-----------|--------------|-------------------------|
| AUX1-F    | MD04G1149300 | CCAGGAGCCTATAAAAGGGAAGG |
| AUX1-R    | MD04G1149300 | AAAGCGATGAAGCGAGTGAGA   |
| CRE1-1-F  | MD15G1243500 | CTTGGAGGTGGGGATGGATG    |
| CRE1-1-R  | MD15G1243500 | TTTGGGTGAACTGTGGCCTA    |
| APH-1-F   | MD04G1212100 | CGGTACATGGCAGGAGGTTT    |
| APH-1-R   | MD04G1212100 | TCCTTGATTACTTGCCAGCCT   |
| B-ARR-F   | MD00G1165700 | CGACGATCCCACTTGGCTTA    |
| B-ARR-R   | MD00G1165700 | TTGGCGAAGCAAGTGCAAAG    |
| A-ARR-F   | MD08G1161200 | CTTCGGCCTTACCTGCTCAA    |
| A-ARR-R   | MD08G1161200 | TTGACGGTAGTGCCCTTCAC    |
| PYR/PYL-F | MD06G1034000 | TTATCTCAGGGCTACCGGCT    |
| PYR/PYL-R | MD06G1034000 | CGCCCCCGATGATACTGAAA    |
| ABF-F     | MD15G1022500 | TCGTCTTCCTCTACTGCGGA    |
| ABF-R     | MD15G1022500 | GATTCGCGGTTTCGATTGCAT   |
| SnRK2-F   | MD01G1035000 | AGGACAAATGGAGTGGCGAG    |
| SnRK2-R   | MD01G1035000 | CGGATGCTTCAAGGACCTGT    |
| SnRK2-2-F | MD06G1046300 | TTTGGTCCTGTGGTGTGACG    |
| SnRK2-2-R | MD06G1046300 | GGTATGGTGTACTGGGCACT    |
| MYC2-1-F  | MD01G1045500 | TCCTTGAGCAGTGTGGAGAG    |
| MYC2-1-R  | MD01G1045500 | CGTCTCTTCTTGAGCGAGT     |
| JAZ-F     | MD16G1020800 | GGCGGAAGCATTTCCTTGT     |

|          |              |                            |
|----------|--------------|----------------------------|
| JAZ-R    | MD16G1020800 | TCTCAGCCCACCACAATCAC       |
| GID1-F   | MD02G1276600 | CCGCCTCAAGTCCAGTTCAT       |
| GID1-R   | MD02G1276600 | CCGTAGGTTTTTCGTTGACGC      |
| DELLA-F  | MD02G1295800 | GCTTGAGTTGGCTGGGTTTG       |
| DELLA-R  | MD02G1295800 | TTGTACCCGTCATAGCCACG       |
| BRI1-F   | MD05G1190600 | TCGAGCAAGATTTTCGAGCCC      |
| BRI1-R   | MD05G1190600 | GCTCTGACGCCATGTATCCT       |
| TCH4-F   | MD02G1192600 | GGCCATCCAACTCGTTCTTG       |
| TCH4-R   | MD02G1192600 | TTCATGCTCACACGCCCAAA       |
| SUS1-F   | MD02G1024600 | AACAAAACCGCAAACGCCAT       |
| SUS1-R   | MD02G1024600 | CCGTGGTTGTGGTTGTGTAAC      |
| PP1-F    | MD04G1056200 | TGTATGTGATGCTCCCGCTC       |
| PP1-R    | MD04G1056200 | TCCTTCTCCACCAATCCCCA       |
| CIX1-F   | MD00G1201600 | TGGAGGCGGCTATCTCAAAC       |
| CIX1-R   | MD00G1201600 | GCGGATAAAGGGTCGGAAGT       |
| CALS1-F  | MD07G1001800 | AAGCAGATCGGGCACAACCTT      |
| CALS1-R  | MD07G1001800 | ACTTCAACAGCCTCCGTCTG       |
| CYCD1-F  | MD16G1087700 | AACTCTCAGTCGCTTGACG        |
| CYCD1-R  | MD16G1087700 | AACAGCGAAGGAACCAGAGG       |
| TCH2-F   | MD13G1168600 | CTTCAACGACATCCGCGAAC       |
| TCH2-R   | MD13G1168600 | CTCGGCGTAGTTGTTGGACT       |
| ARF-F    | MD07G1162400 | GTTCAATTGACTGGAAGGGGCGC    |
| ARF-R    | MD07G1162400 | TCATGATCTGATGGTTATGGTGGTGA |
| GH3-F    | MD01G1037100 | TGAACTTAGTTGTCCTCCCCA      |
| GH3-R    | MD01G1037100 | TCACGTAACATGTCAAAAATGTCTC  |
| SAUR-9-F | MD05G1223400 | CGCAGAAACGAATCGTTCCGTGTG   |
| SAUR-9-R | MD05G1223400 | GTTCAGGAGATCGTGCAGGTCATG   |

---
